# Supplementary material
Source: PubMed Central journal article supplement (PMC4651817)

**Cytoplasm**

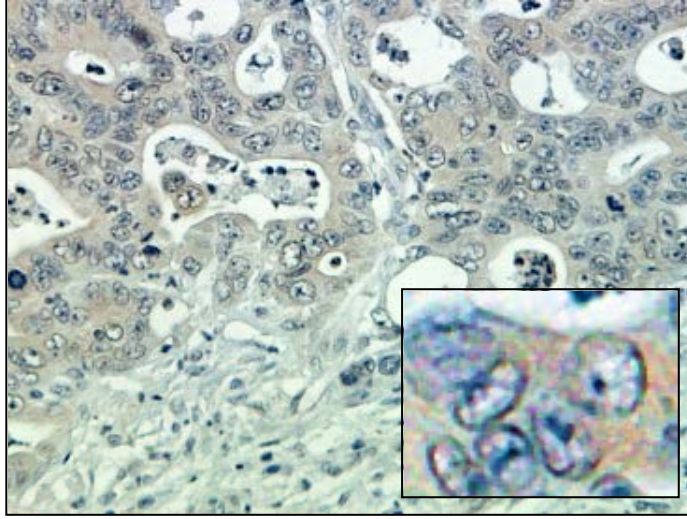

**Cytoplasm and nucleus**

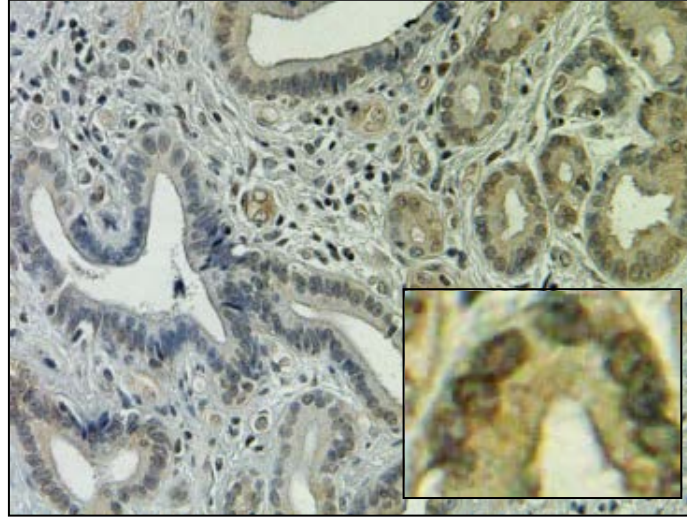

**Nucleus**

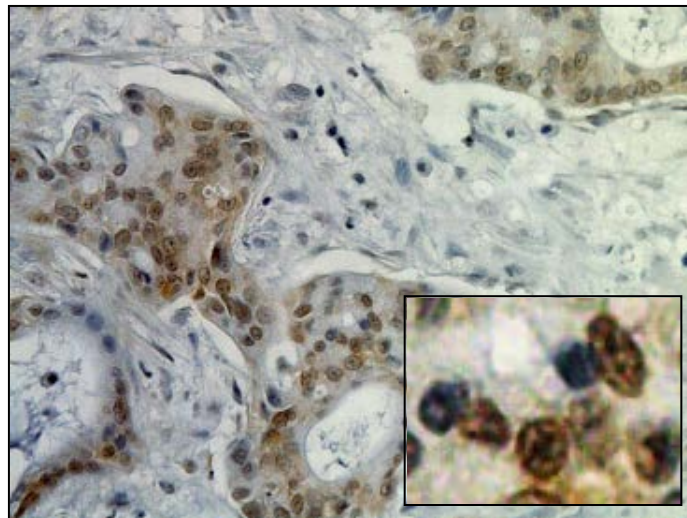

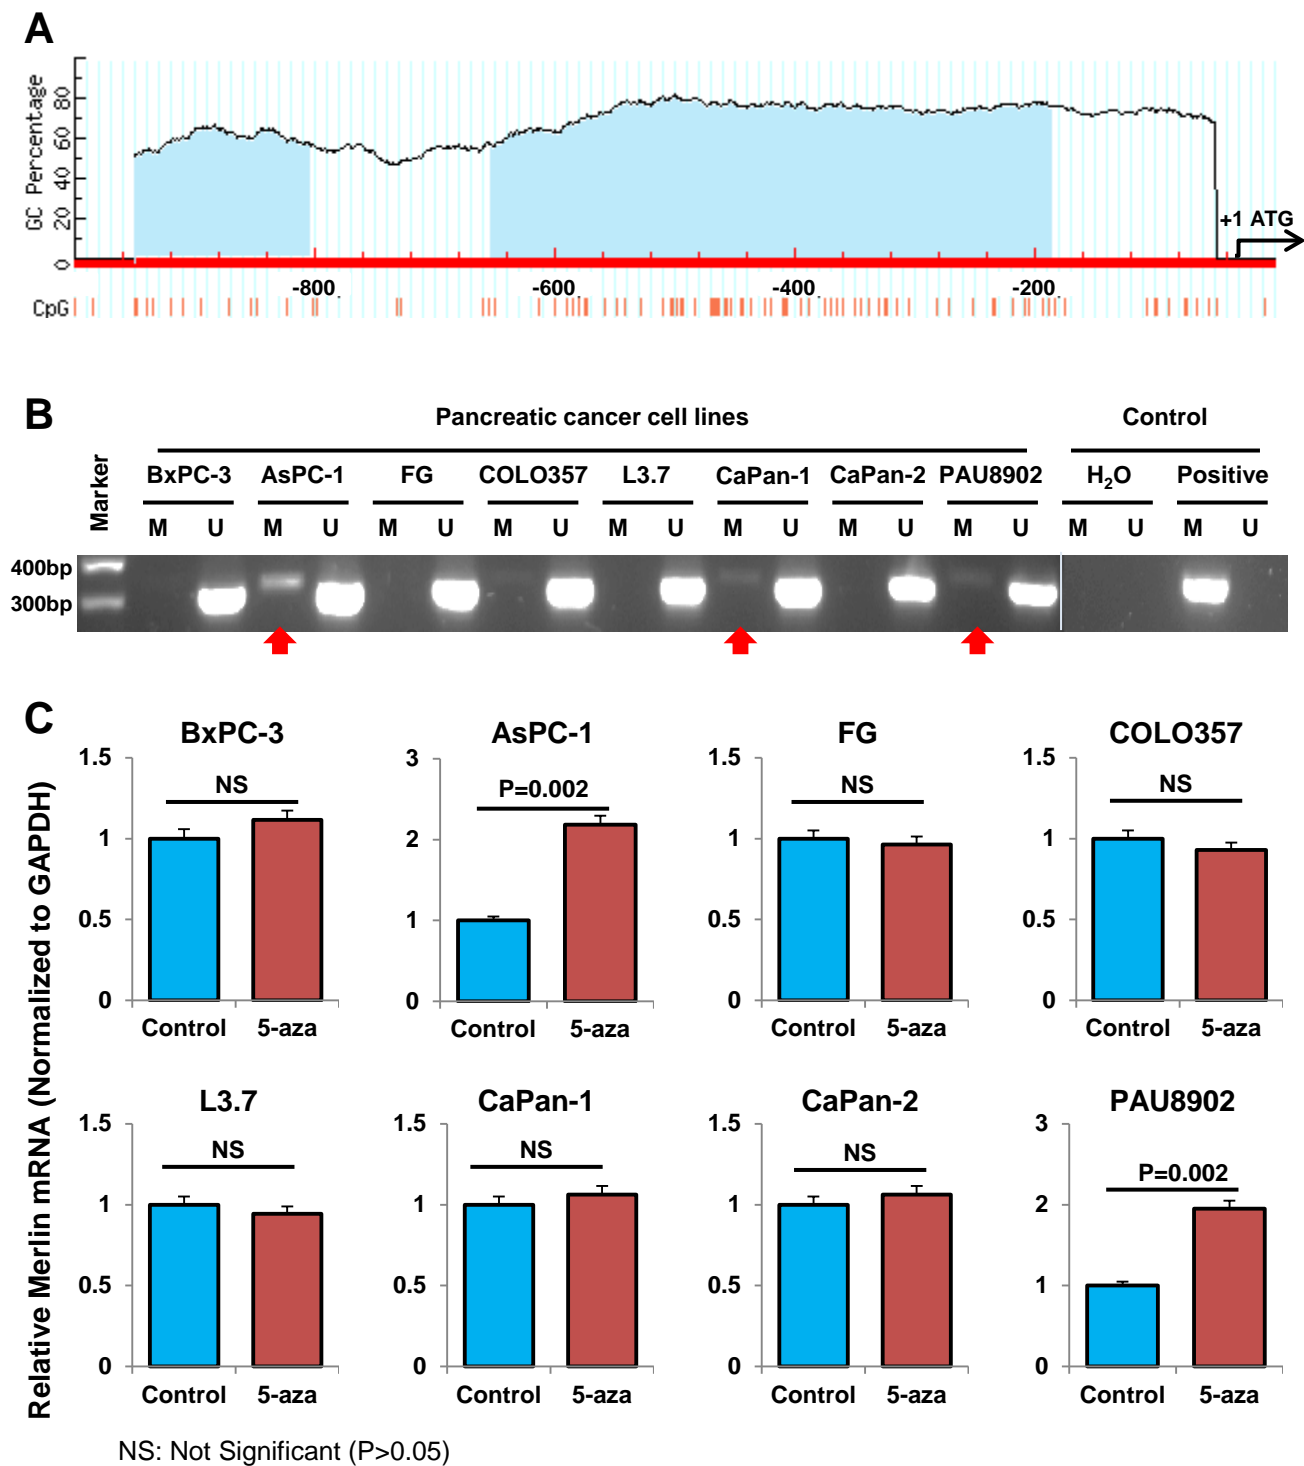

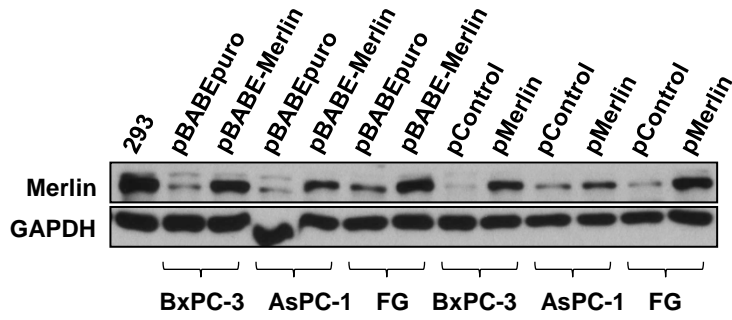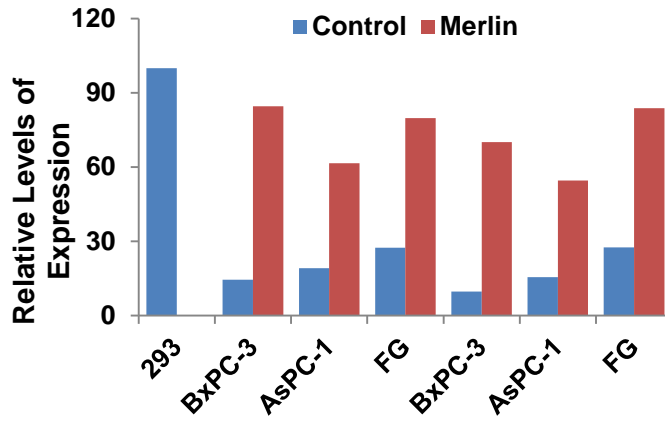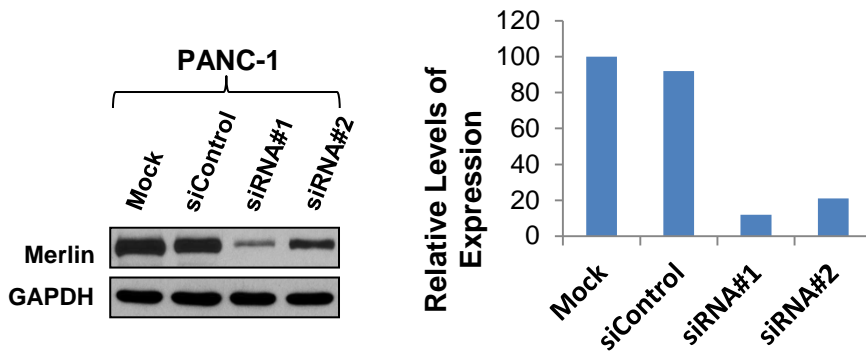

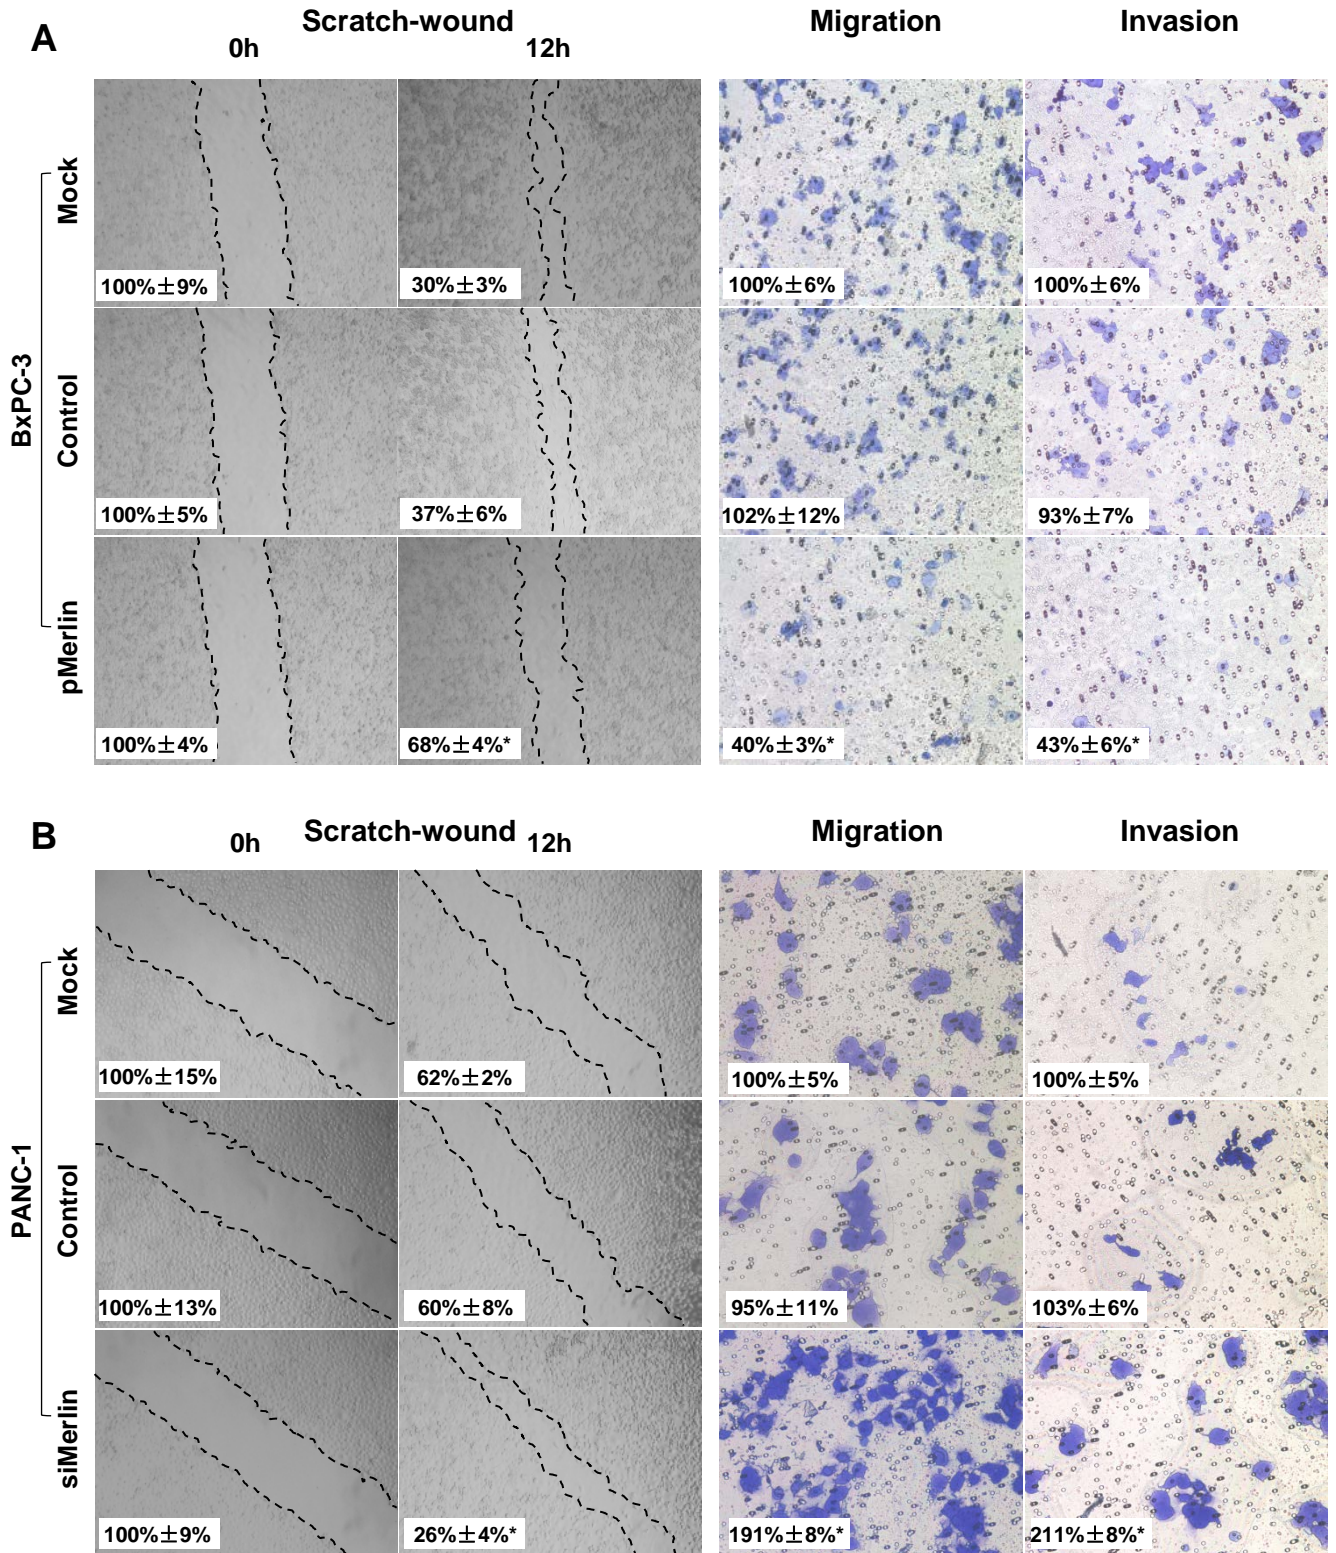

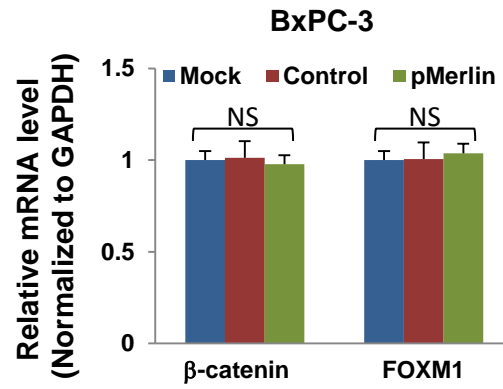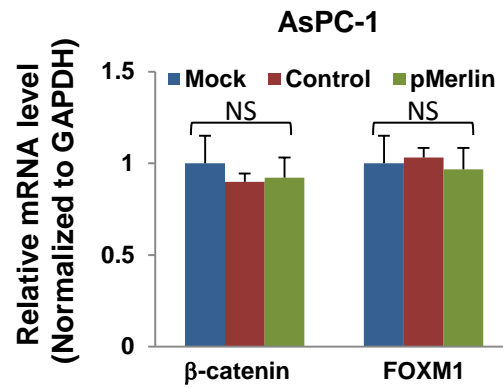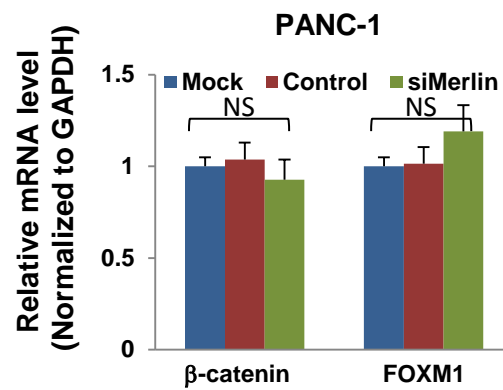

NS: Not Significant ( $P > 0.05$ )

**A BxPC-3**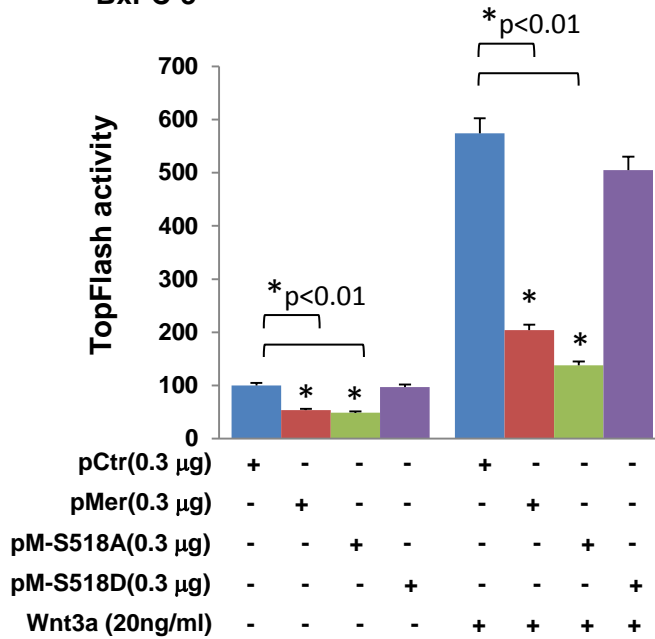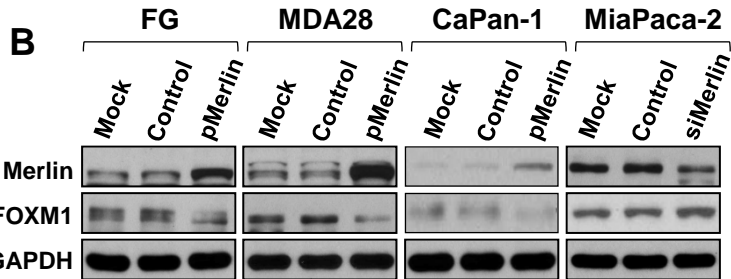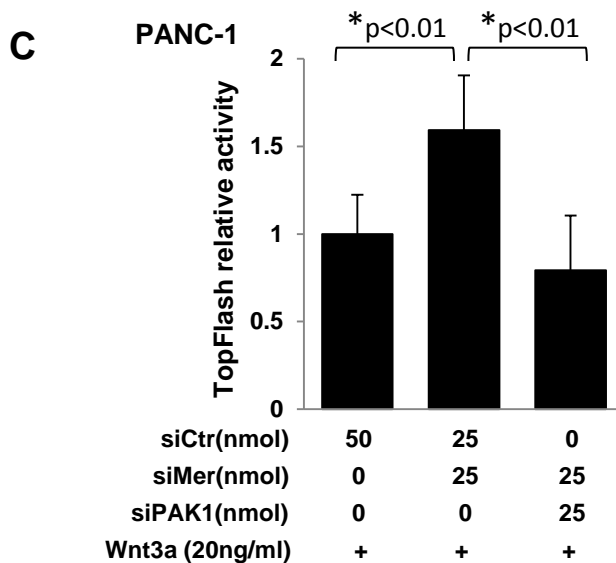

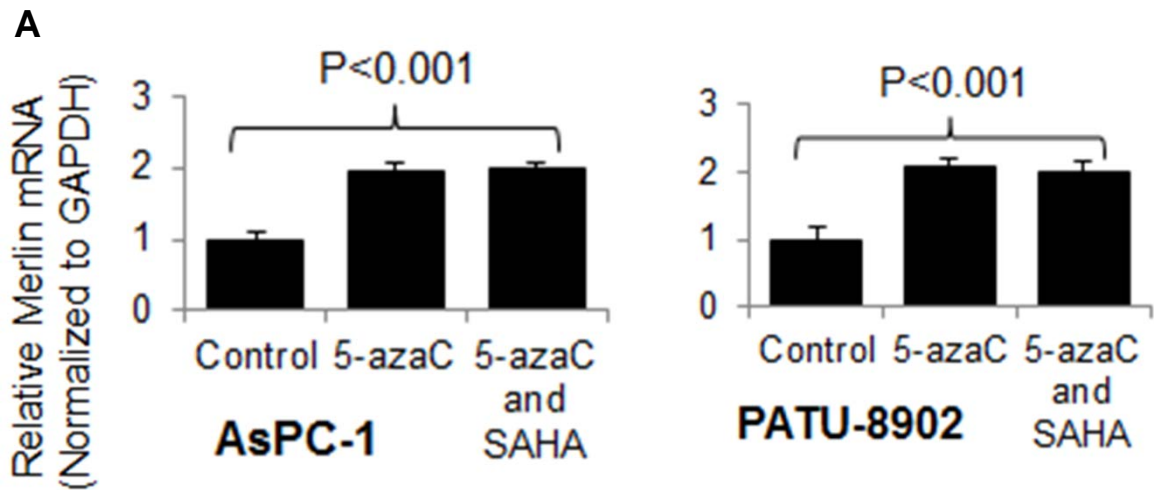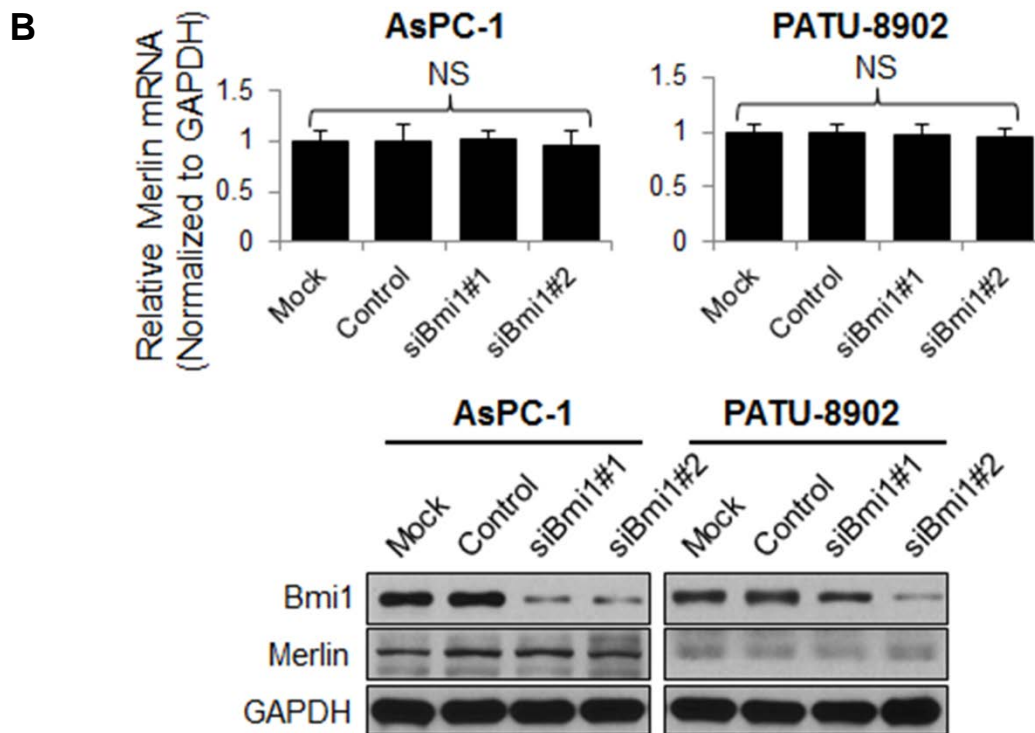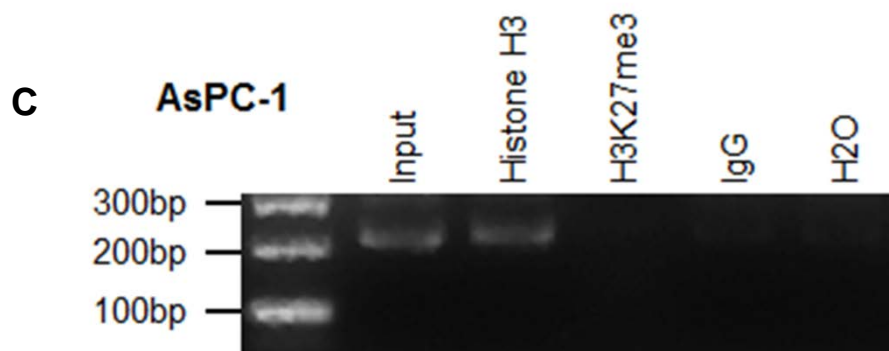

Supplement: NIHMS728157-supplement-2.pdf [file NIHMS728157-supplement-2.pdf]
